# Supplementary material for: Eco-Friendly and Sustainable Process for Converting Hydrous Bioethanol to Butanol
Source: MDPI journal article supplement (doi:10.3390/catal11040498), 2021-04-14
Supplement: s1 [file s1]

## Supplementary Material:

### Eco-friendly and sustainable process for converting hydrous bioethanol to butanol

Miron V. Landau<sup>1,\*</sup>, Tomy Hos<sup>1</sup>, Roxana Vidruk Nehemya<sup>1</sup>, George Nomikos<sup>2</sup>, Moti Herskowitz<sup>1</sup>

<sup>1</sup>*Chemical Engineering Department, Blechner Center for Industrial Catalysis and Process Development, Ben-Gurion University of the Negev, Beer-Sheva 84105, Israel*

<sup>2</sup>*Helbio S.A. Hydrogen & Energy Production Systems. 10 Old National Road Patras-Athens, Rio 26500, Patras, Greece; gnomikos@helbio.com*

\*Corresponding author. Tel.: +972 8 6472141; fax: +972 8 6479427

E-mail address: mlandau@bgu.ac.il (M.V. Landau).

The view of the mini-pilot unit used for catalysts testing is presented in Figure S1.

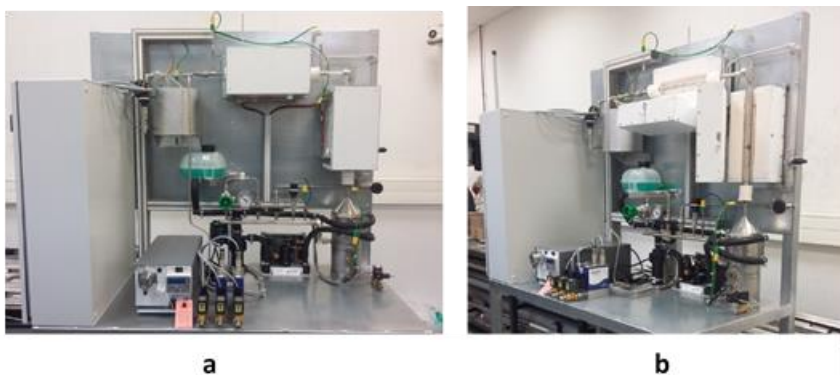

Figure S1. Mini-pilot unit used for catalysts testing: a – front view; b- side view

The peripheral equipment of mini-pilot unit used for catalysts testing is consisted of the following parts: high precision liquid pump, for regulating the inlet feed of ethanol and ethanol-water mixtures; mass

flow controllers, necessary for catalyst pre-treatment and during start-up, operation and shut-down procedures; electrical heaters for regulating the reactor inlet temperature as well as the temperature across the reactor; electro-valves ON/OFF placed on the feeding inlets and on the system outlet, as well as manual ball valves; pressure sensors, for measuring the operating pressure of the system; pressure regulator for adjusting the pressure of the system to a desired level; temperature sensors (thermocouple K-type), for measuring the temperature in crucial points of the system; recirculator, for recirculating the cooling liquid; radiator, for cooling down the cooling liquid. The control unit of the system was properly wired with the peripheral equipment based on a Programmable Logic Controller (PLC) permitting conditioning and supervising all process parameters (pressure, temperature, flows etc.) providing reliable and safe operation. In addition, an interface (Supervisory Control and Data Acquisition Software, SCADA) has been developed using INDUSOFT, permitting the operator to observe and regulate the above-mentioned critical parameters of the processes.

The specifications of equipment unit in process simulation have been evaluated using CHEMCAD 7.1.1 simulations software. Distillation columns are simulated using a rigorous multi-stage vapor-liquid equilibrium module. Number of stages and refluxes ratio are adjusted to reach high product purity. Sizing of storage tanks was calculated for allowing 96h of storing. The specifications of each item of equipment is entered into CHEMCAD costing tool or other cost formulas available in the literature for calculating the purchase cost of each item.

**Table S1.** Summary of purchase cost for main equipment units<sup>a</sup>

| Tag No  | Equipment unit       | Unit size                            | Heat duty, MW | Remarks                      | Purchase cost, \$K | Ref. |
|---------|----------------------|--------------------------------------|---------------|------------------------------|--------------------|------|
| R-01    | Adiabatic reactor    | V=75m <sup>3</sup>                   | 1.8           |                              | 150                | [2]  |
| S-01    | Flash drum           | D=1.5 m, H=6.5 m                     |               |                              | 50                 |      |
| P-01A/B | Pumps                | Q=4.5L/sec, Single-stage centrifugal |               | 2 units                      | 9                  |      |
| P-02A/B |                      | Q=17L/sec, Single-stage centrifugal  |               | 2 units                      | 12                 |      |
| P-03A/B |                      | Q=20L/sec, Single-stage centrifugal  |               | 2 units                      | 13                 |      |
| C-01    | Cooling tower&pumps  | Q=1,800L/sec                         | 73.8          |                              | 700                | [2]  |
| HE-01   | Heat exchangers      | A=3,000m <sup>2</sup>                | 31.5          |                              | 700                |      |
| HE-02   |                      | A=450m <sup>2</sup>                  | 3.8           |                              | 85                 |      |
| B-01    | Boiler               | Q=125 ton/h steam                    | 81.7          |                              | 1,800              | [1]  |
| D-01    | Distillation columns | D=3.2m, H=15m                        | 23.9          | 40 stages, Reflux ratio=0.4  | 840                |      |
| D-02    |                      | D=1.5m, H=7.5m                       | 3.0           | 15 stages, Reflux ratio=0.8  | 150                |      |
| D-03    |                      | D=1.7m, H=8m                         | 4.6           | 20 stages, Reflux ratio=24.7 | 170                |      |
| D-04    |                      | D=4.4m, H=12m                        | 41.6          | 30 stages, Reflux ratio=2.4  | 1,150              |      |
|         | <b>Total</b>         |                                      |               |                              | <b>5,829</b>       |      |

<sup>a</sup> Equipment costs were obtained from CHEMCAD if not stated otherwise.

**Table S2.** Assumptions for economic model

| <b>Parameter</b>           | <b>Value</b>                                                   |
|----------------------------|----------------------------------------------------------------|
| Economic plant life        | 25 years                                                       |
| Discount rate              | 10%                                                            |
| Depreciation rate          | 4%/year                                                        |
| Fixed expenses growth rate | 0.5%/year                                                      |
| Plant operation time       | 8,000h/year                                                    |
| Average income tax rate    | 35%                                                            |
| Construction time          | 3 years                                                        |
| 1 <sup>st</sup> year       | 30% of fixed capital                                           |
| 2 <sup>nd</sup> year       | 40% of fixed capital                                           |
| 3 <sup>rd</sup> year       | 30% of fixed capital+<br>30% of fixed and<br>variable expenses |
| 4 <sup>th</sup> year       | 85% of design basis<br>production rate                         |

**Table S3.** Economic parameters for different plant capacities.

| <b>Plant scale,<br/>Butanol ton/year</b>         | <b>8,000</b>  | <b>25,000</b> | <b>80,000</b> | <b>250,000</b> | <b>800,000</b> |
|--------------------------------------------------|---------------|---------------|---------------|----------------|----------------|
| <b>Purchase Cost of<br/>Equipment (PCE), \$K</b> | <b>1,464</b>  | <b>2,900</b>  | <b>9,924</b>  | <b>11,547</b>  | <b>23,205</b>  |
| <b>Total Capital Investment<br/>(TCI), \$K</b>   | <b>7,823</b>  | <b>15,495</b> | <b>50,650</b> | <b>61,699</b>  | <b>123,990</b> |
| <b>Annual expenses</b>                           | <b>\$K</b>    |               |               |                |                |
| Maintenance                                      | 569           | 1,127         | 2,265         | 4,487          | 9,017          |
| Operating labor                                  | 900           | 900           | 1,200         | 1,500          | 2,100          |
| Laboratory costs                                 | 225           | 225           | 300           | 375            | 525            |
| Supervision                                      | 225           | 225           | 300           | 375            | 525            |
| Plant overheads                                  | 450           | 450           | 600           | 750            | 1,050          |
| Capital charges                                  | 284           | 563           | 1,133         | 2,244          | 4,509          |
| Local taxes                                      | 142           | 282           | 566           | 1,122          | 2,254          |
| Insurance                                        | 142           | 282           | 566           | 1,122          | 2,254          |
| <b>Total fixed expenses</b>                      | <b>2,938</b>  | <b>4,054</b>  | <b>6,930</b>  | <b>11,974</b>  | <b>22,235</b>  |
| Hydrous Ethanol                                  | 7,654         | 23,919        | 76,540        | 239,188        | 765,400        |
| Catalyst& Operating materials                    | 282           | 792           | 2,351         | 6,992          | 21,640         |
| Utilities                                        | 1,052         | 3,286         | 10,516        | 32,863         | 105,162        |
| Acetaldehyde credit                              | -780          | -2,438        | -7,800        | -24,375        | -78,000        |
| C5+ alcohol mixture credit                       | -2,255        | -7,048        | -22,552       | -70,475        | 225,520        |
| <b>Total variable expenses</b>                   | <b>5,953</b>  | <b>18,513</b> | <b>59,056</b> | <b>184,193</b> | <b>588,682</b> |
| <b>Total direct costs</b>                        | <b>8,890</b>  | <b>22,566</b> | <b>65,986</b> | <b>196,167</b> | <b>610,917</b> |
| <b>Indirect costs</b>                            | <b>1,778</b>  | <b>4,513</b>  | <b>13,197</b> | <b>39,233</b>  | <b>122,183</b> |
| <b>Annual production expenses</b>                | <b>10,669</b> | <b>27,080</b> | <b>79,183</b> | <b>235,400</b> | <b>733,101</b> |
| <b>LCOP, \$/kg butanol</b>                       | <b>1.54</b>   | <b>1.22</b>   | <b>1.09</b>   | <b>1.02</b>    | <b>0.98</b>    |

## References

1. R. Sinnott. Chemical Engineering Design: Chemical Engineering Volume 6. Elsevier, 2005
2. R. Sinnott, G. Towler. Principles, Practice and Economics of Plant and Process Design, Chemical Engineering Design, Elsevier, 2008
